# Supplementary material for: Fast and efficient method for molecular weight analysis of cellulose pulp, in-process and finished product
Source: Royal Society of Chemistry journal article supplement (doi:10.1039/c5ay03012a), 2016-01-01
Supplement: c5ay03012a1.pdf [file c5ay03012a1.pdf]

Supplementary data

**Table 1.** Comparative study – Four columns

| Mp     | Theoretical Mw | Observed Mw | R2     | Retention Time |
|--------|----------------|-------------|--------|----------------|
| 180    | 180            | -           | 0.9988 | -              |
| 667    | 667            | 659         |        | 32.37          |
| 6100   | 6200           | 6300        |        | 29.85          |
| 9600   | 10000          | 9933        |        | 29.38          |
| 21100  | 21700          | 20229       |        | 28.36          |
| 47100  | 48800          | 46913       |        | 27.22          |
| 107000 | 113000         | 98191       |        | 26.20          |
| 194000 | 200000         | 200287      |        | 25.20          |
| 344000 | 366000         | 401314      |        | 24.25          |
| 708000 | 805000         | 635295      |        | 23.63          |

**Table 2.** Comparative study – Two columns

| Mp     | Theoretical Mw | Observed Mw | R2     | Retention Time |
|--------|----------------|-------------|--------|----------------|
| 180    | 180            | 181         | 0.9995 | 17.82          |
| 667    | 667            | 650         |        | 17.20          |
| 6100   | 6200           | 6415        |        | 15.90          |
| 9600   | 10000          | 9991        |        | 15.62          |
| 21100  | 21700          | 20425       |        | 15.16          |
| 47100  | 48800          | 43927       |        | 14.65          |
| 107000 | 113000         | 101128      |        | 14.09          |
| 194000 | 200000         | 209281      |        | 13.60          |
| 344000 | 366000         | 377800      |        | 13.21          |
| 708000 | 805000         | 652902      |        | 12.86          |

Table 1 and 2 are combined in main article

**Table 3.** System Precision for HPLC

| Mp     | Theoretical Mw | Calculated Mw | Standard deviation | %RSD | Retention time |
|--------|----------------|---------------|--------------------|------|----------------|
| 180    | 180            | 192           | 1                  | 0.6  | 17.88          |
| 107000 | 113000         | 114364        | 2242               | 2.0  | 14.14          |
| 708000 | 805000         | 747803        | 2327               | 0.3  | 12.91          |

**Table 4.** Summary table of accuracy for standard

| Mp     | Theoretical Mw | Observed Mw | % Error |
|--------|----------------|-------------|---------|
| 180    | 180            | 191         | 6       |
| 107000 | 113000         | 112469      | 0.5     |
| 708000 | 805000         | 749356      | 7       |

**Table 5.** Accuracy study for samples

| Sample Id  | Cp   | Dp  | Observed MW | Observed Mn | PDi  |
|------------|------|-----|-------------|-------------|------|
| Pulp       | 17.6 | 845 | 495341      | 74401       | 6.65 |
| In-process | 12.0 | 570 | 322930      | 117361      | 2.75 |
| Fiber      | 5.7  | 266 | 126810      | 40930       | 3.10 |

**Table 6.** Method precision study

| Chemist | Observed Mw | Observed Mn | Average of MWD =<br>Mw / Mn | Standard Deviation | %RSD | Retention time |
|---------|-------------|-------------|-----------------------------|--------------------|------|----------------|
| One     | 114364      | 78435       | 1.46                        | 0.005              | 0.3  | 14.14          |
| Two     | 112257      | 73885       | 1.52                        | 0.069              | 4.6  | 14.15          |

**Table 7.** Robustness study – Summary table

| Theoretical Mw                                  | Average of observed Mw of six replicate each | %Error |
|-------------------------------------------------|----------------------------------------------|--------|
| Change in column temperature by +5°C            |                                              |        |
| 180                                             | 188                                          | 4.5    |
| 113000                                          | 112809                                       | -0.2   |
| 805000                                          | 729015                                       | -9.4   |
| Change in column temperature by -5°C            |                                              |        |
| 180                                             | 188                                          | 4.5    |
| 113000                                          | 111966                                       | -0.9   |
| 805000                                          | 743954                                       | -7.6   |
| Change in flow rate by +0.2ml                   |                                              |        |
| 180                                             | 187                                          | 4.0    |
| 113000                                          | 113046                                       | 0.04   |
| 805000                                          | 658281                                       | -18.2  |
| Change in flow rate by -0.2ml                   |                                              |        |
| 180                                             | 188                                          | 4.6    |
| 113000                                          | 115411                                       | 2.1    |
| 805000                                          | 707924                                       | -12.1  |
| Change in concentration of LiCl in DMAC by +20% |                                              |        |
| 180                                             | 186                                          | 3.4    |
| 113000                                          | 112648                                       | -0.3   |
| 805000                                          | 693441                                       | -13.9  |
| Change in concentration of LiCl in DMAC by -20% |                                              |        |
| 180                                             | 190                                          | 5.7    |
| 113000                                          | 112360                                       | -0.6   |
| 805000                                          | 733671                                       | -8.9   |

**Table 8.** Solution stability study for standard with Mp = 107000

| Time | Mw     | Mn    | PDi =<br>Mw/Mn | Average<br>PDi | Standard<br>Deviation | %RSD |
|------|--------|-------|----------------|----------------|-----------------------|------|
| T0   | 116557 | 76367 | 1.526          | 1.542          | 0.015                 | 1.51 |
| T1   | 114915 | 74549 | 1.541          |                |                       |      |
| T2   | 115595 | 75476 | 1.532          |                |                       |      |
| T3   | 113761 | 71472 | 1.529          |                |                       |      |
| T4   | 114145 | 74627 | 1.530          |                |                       |      |
| T5   | 114388 | 73649 | 1.553          |                |                       |      |
| T6   | 116482 | 76124 | 1.530          |                |                       |      |
| T7   | 116099 | 76749 | 1.543          |                |                       |      |
| T8   | 116611 | 74959 | 1.556          |                |                       |      |
| T9   | 118718 | 76614 | 1.550          |                |                       |      |
| T10  | 117681 | 74643 | 1.577          |                |                       |      |

**Table 9.** Solution stability study for fibre sample

| Time | Mw     | Mn    | MWD =<br>Mw/Mn | Average | Standard<br>Deviation | % RSD |
|------|--------|-------|----------------|---------|-----------------------|-------|
| T0   | 151209 | 73367 | 2.06           | 2.135   | 0.124                 | 5.03  |
| T1   | 157434 | 78243 | 2.01           |         |                       |       |
| T2   | 149102 | 73547 | 2.03           |         |                       |       |
| T3   | 156181 | 75424 | 2.07           |         |                       |       |
| T4   | 151823 | 75186 | 2.02           |         |                       |       |
| T5   | 155160 | 67499 | 2.30           |         |                       |       |
| T6   | 149955 | 65914 | 2.28           |         |                       |       |
| T7   | 154275 | 72000 | 2.14           |         |                       |       |
| T8   | 150821 | 71545 | 2.11           |         |                       |       |
| T9   | 157525 | 67347 | 2.34           |         |                       |       |
